# Supplementary material for: Three-dimensional structured PLCL/ADM bioactive aerogel for rapid repair of full-thickness skin defects
Source: Royal Society of Chemistry journal article supplement (doi:10.1039/d4bm01214c), 2024-01-01
Supplement: d4bm01214c1.pdf [file d4bm01214c1.pdf]

## **Supplementary Information**

### **Three-dimensional Structured PLCL/ADM Bioactive Aerogel for Rapid Repair of Full-thickness Skin Defects**

Xuchao Ning<sup>a,b#</sup>, Runjia Wang<sup>c#</sup>, Na Liu<sup>d</sup>, Yong You<sup>a</sup>, Yawen Wang<sup>d,e</sup>, Jing Wang<sup>e</sup>, Yuanfei Wang<sup>f</sup>, Zhenyu Chen<sup>a</sup>, Haiguang Zhao<sup>b\*</sup>, Tong Wu<sup>a,d,e\*</sup>

<sup>a</sup>The Affiliated Hospital of Qingdao University, Qingdao University, Qingdao 266000, China

<sup>b</sup>Department of Plastic Surgery, Qilu Hospital (Qingdao), Shandong University, Qingdao 266035, China

<sup>c</sup>School of Stomatology, Shandong University, Jinan 250012, China

<sup>d</sup>Institute of Neuroregeneration & Neurorehabilitation, Department of Pathophysiology, School of Basic Medicine, Qingdao University, Qingdao 266071, China

<sup>e</sup>Shandong Key Laboratory of Medical and Health Textile Materials, Collaborative Innovation Center for Eco-textiles of Shandong Province and the Ministry of Education, College of Textile & Clothing, Qingdao University, Qingdao 266071, China

<sup>f</sup>Qingdao Stomatological Hospital Affiliated to Qingdao University, Qingdao 266001, China

#These authors contribute equally to this work.

\*Address correspondence:

Haiguang Zhao, [zhg020776@qlyyqd.com](mailto:zhg020776@qlyyqd.com)

Tong Wu, [twu@qdu.edu.cn](mailto:twu@qdu.edu.cn)

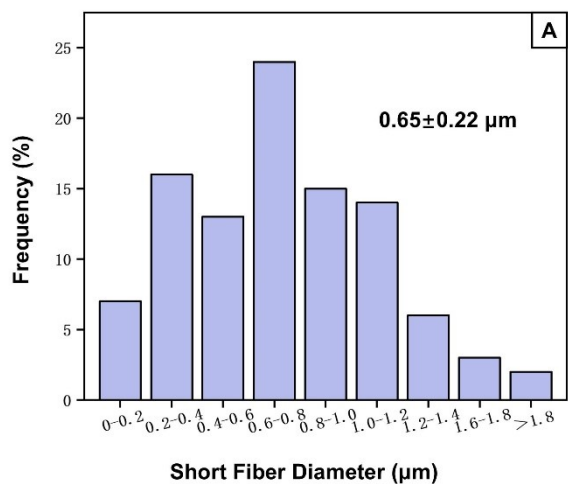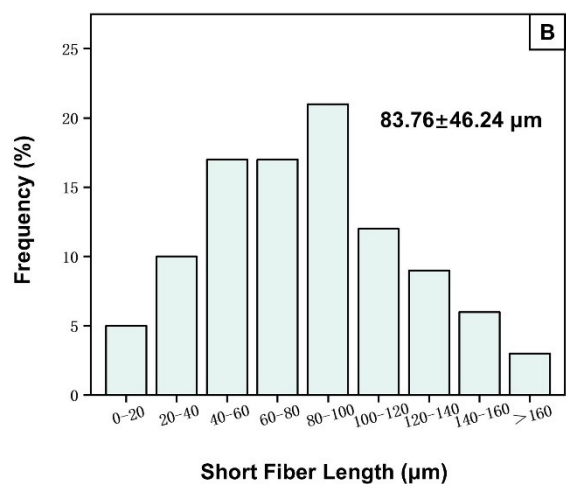

**Figure S1.** (A) The PLCL/ADM short fibers' diameter distribution chart. The average diameter is denoted in the figure. (B) The PLCL/ADM short fibers' length distribution chart. The average diameter is denoted in the figure.

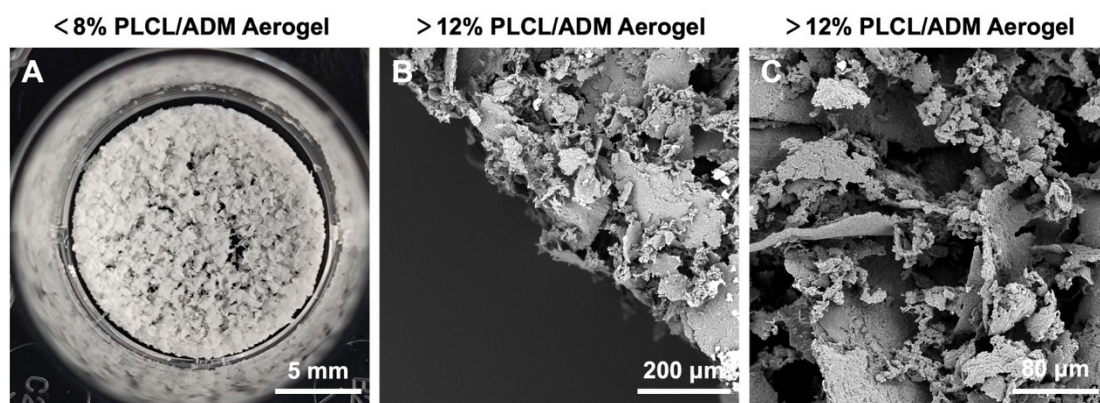

**Figure S2.** (A) Digital image of the sample after freeze-drying in the mold when the homogenization concentration is below 8%. Stable cross-linkage between nanofibers cannot be formed automatically. (B, C) SEM images of the sample when the homogenization concentration is higher than 12%. The nanofiber scaffold could not be homogenized to homogeneous single fibers.

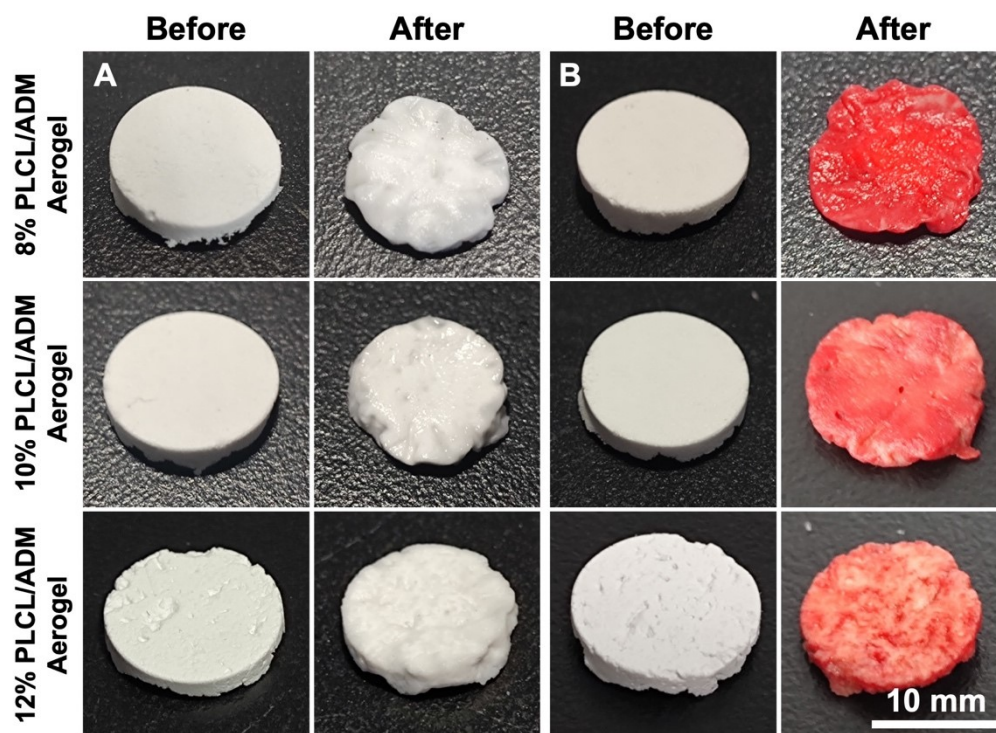

**Figure S3.** (A) Digital images of aerogels before and after water absorption tests. (B) Digital images of aerogels before and after blood absorption tests.
